# Supplementary material for: Se/N co-doped carbon nanorods for potassium ion storage
Source: Royal Society of Chemistry journal article supplement (doi:10.1039/d2qi00971d), 2022-01-01
Supplement: d2qi00971d1.pdf [file d2qi00971d1.pdf]

# Se/N co-doped carbon nanorods for potassium ion storage

Gaohui Ding,<sup>1,2</sup> Yue Xiao,<sup>1,2</sup> Yuhang Zhang,<sup>1,2</sup> Zhiqiang Li,<sup>1,2</sup> Lingzhi Wei,<sup>1,2</sup> Ge Yao,<sup>1,2</sup> Helin Niu,<sup>2</sup> and Fangcai Zheng\*<sup>1,2</sup>

<sup>1</sup> Institutes of Physical Science and Information Technology, Key Laboratory of Structure and Functional Regulation of Hybrid Materials, Anhui University, Ministry of Education, Hefei, 230601, People's Republic of China

<sup>2</sup> Key Laboratory of Functional Inorganic Material Chemistry of Anhui Province, Anhui University, Hefei 230601, People's Republic of China

\* Corresponding authors: zfc@mail.ustc.edu.cn (F.C. Zheng)

|                                                                                                                           |    |
|---------------------------------------------------------------------------------------------------------------------------|----|
| Experimental Section .....                                                                                                | 2  |
| Figure S1. XRD pattern of Mn-BTC.....                                                                                     | 5  |
| Figure S2. (a) SEM and (b) TEM images of Mn-BTC. ....                                                                     | 5  |
| Figure S3. XRD pattern of MnO@C. ....                                                                                     | 6  |
| Figure S4. (a) SEM and (b) TEM images of MnO@C. ....                                                                      | 6  |
| Figure S5. (a) SEM and (b) TEM images of CRs.....                                                                         | 6  |
| Figure S6. N <sub>2</sub> adsorption isotherms and the corresponding pore size distribution of (a) CRs and (b) SeCRs..... | 7  |
| Figure S7. The XPS survey spectra.....                                                                                    | 7  |
| Figure S8. High-resolution C 1s XPS spectra of (a) CRs and (b) SeCRs.....                                                 | 8  |
| Figure S9. High-resolution O 1s XPS spectrum of (a) CRs, (b) SeCRs and (c) SeNCRs. ....                                   | 8  |
| Figure S10. High-resolution Se 3d XPS spectrum of SeCRs.....                                                              | 9  |
| Figure S11. The plots of log(i)-log(v) for the b-value determination from CV scans of CRs, SeCRs and SeNCRs. ....         | 9  |
| Figure S12. The equivalent circuit model of electrochemical impedance spectroscopy. ....                                  | 10 |
| Figure S13. EIS curves of SeNCRs after different cycles from the 0 to 450th cycles.                                       | 10 |
| Figure S14. <i>Ex-situ</i> XRD spectra of the SeNCRs. ....                                                                | 10 |
| Figure S15. (a) and (b) EDS mapping images of SeNCRs after discharge/charge process.....                                  | 11 |
| Table S1. Textural parameters of SeNCRs and heteroatom doped SeNCRs. ....                                                 | 11 |
| Table S2. Element composition of different samples from the XPS test.....                                                 | 11 |

## Experimental Section

## *Material synthesis*

*Chemicals:* 1,3,5-benzenetricarboxylic acid ( $C_9H_6O_6$ , 99%), manganous acetate tetrahydrate ( $C_4H_6MnO_4$ ), polyvinylpyrrolidone (PVP), selenium (Se-powder, 99.99%), ethanol and ultrapure water were used. All starting materials were obtained from commercial suppliers and used without further purification.

*Synthesis of Mn-BTC:* 1,3,5-benzenetricarboxylic acid (0.09 g) was dissolved in ethanol (5 ml) in a beaker, stirring a few minutes, and 5 ml of water was added, marked as solution A. And manganous acetate tetrahydrate (0.049 g) and polyvinylpyrrolidone (0.3 g) were fully dissolved in the mixed solution of ultrapure water (5 ml) and 5 ml ethanol in another beaker to form solution B. The solution A was slowly added into the solution B. After 24 h later, the product was thoroughly washed by ultrapure water and ethanol several times. Ultimately, the powder was dried in an oven at 60 °C overnight.

*Synthesis of CRs:* The white Mn-BTC was placed in ceramic boat and annealed at 600 °C in  $N_2$  atmosphere with a heating rate of 10 °C  $min^{-1}$  and kept for 2 h. And then, the resulting MnO was etched by HCl. After that washed by ultrapure water and ethanol several times and dried in an oven at 60 °C overnight. The resulting sample is denoted as CRs.

*Synthesis of SeCRs:* The re-prepare CRs and puper selenium powder were placed in ceramic boats respectively (mass ratio of 1:2) and annealed at 600 °C in  $N_2$  atmosphere with a ramp rate of 3 °C  $min^{-1}$  and kept for 2 h. The resulting sample is named as SeCRs.

*Synthesis of SeNCRs:* The re-prepare SeCRs was placed in ceramic boat and annealed at 600 °C in  $NH_3$  atmosphere with a heating rate of 10 °C  $min^{-1}$  and kept for 2 h. The resulting sample is denoted as SeNCRs.

## *Material characterization*

The crystal structures of all samples were determined with an X-ray diffractometer (Rigaku Co, Japan, D/MAX- $\gamma$ A) equipped with Cu-K $\alpha$  radiation. The morphologies of the as-prepared samples were investigated using scanning electron microscopy

(SEM, JEOL JSM-6700 M) with a voltage of 200 kV and transmission electron microscopy (TEM, Hitachi H-800) using an accelerating voltage of 200 kV. High resolution transmission electron microscopy (HRTEM, JEOL-2011) was further performed to investigate the structure. The electronic states of all elements in samples were investigated by X-ray photoelectron spectroscopy (XPS, ESCALAB 250). The Raman spectrum was obtained using a Confocal Laser MicroRaman Spectrometer (Via-Reflex/inVia-Reflex).

### *Electrochemical measurements*

All the electrochemical measurements were characterized employing half coin cells (CR2032). As-synthesized sample, conductive carbon black and polyvinylidene fluoride (PVDF) binder were mixed in N-methylpyrrolidone (NMP) at a mass ratio of 8:1:1, and as-obtained mixture was magnetically stirred to form a homogeneous slurry. The homogenous slurry was obtained and was pasted on a Cu foil and dried at 80 °C overnight under vacuum conditions. After the solvent was completely evaporated, the coated copper foil was punched into a round sheet with a diameter of 14 mm and used as the working electrode. The electrolyte was 3 M KFSI in a mixture of ethylene carbonate (EC) and diethyl carbonate (DEC) (1:1 in volume). The galvanostatic charge-discharge tests was measured by the Neware CT3008 W instrument within a voltage window of 0.01-3.0 V. Cyclic voltammetry (CV) and electrochemical impedance spectroscopy (EIS) were performed on CHI760E electrochemical workstation.

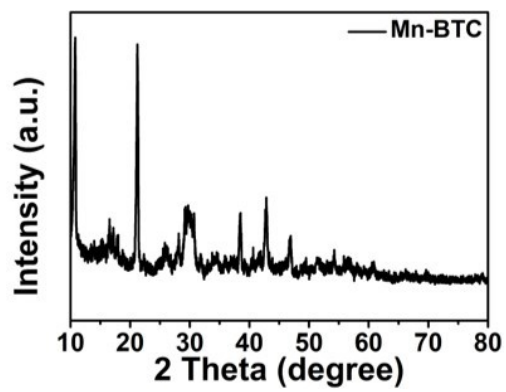

Figure S1. XRD pattern of Mn-BTC.

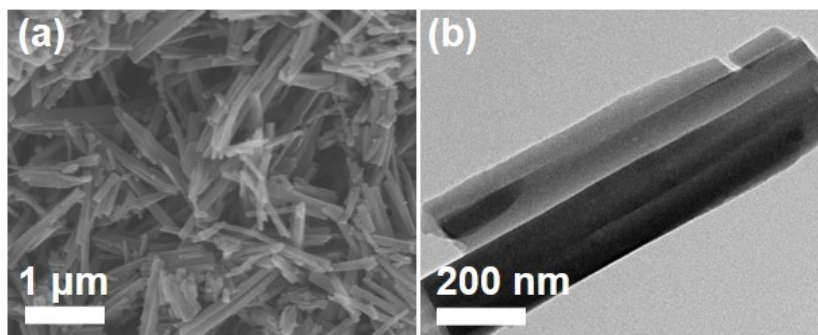

Figure S2. (a) SEM and (b) TEM images of Mn-BTC.

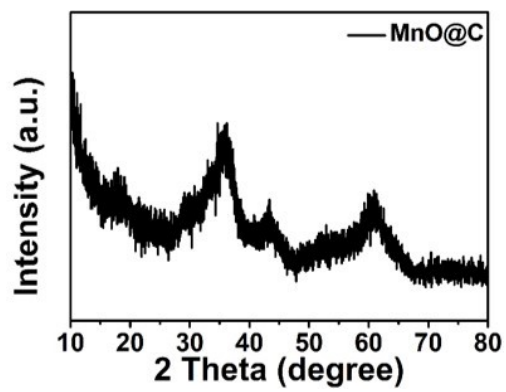

Figure S3. XRD pattern of MnO@C.

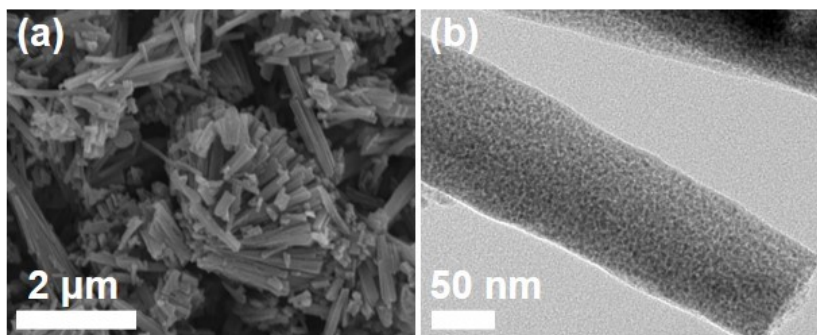

Figure S4. (a) SEM and (b) TEM images of MnO@C.

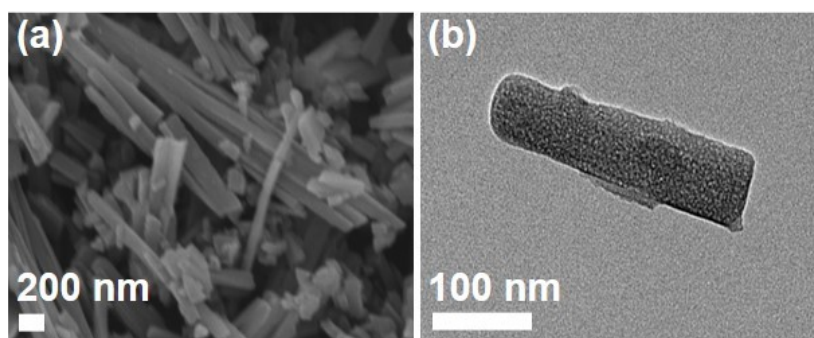

**Figure S5.** (a) SEM and (b) TEM images of CRs.

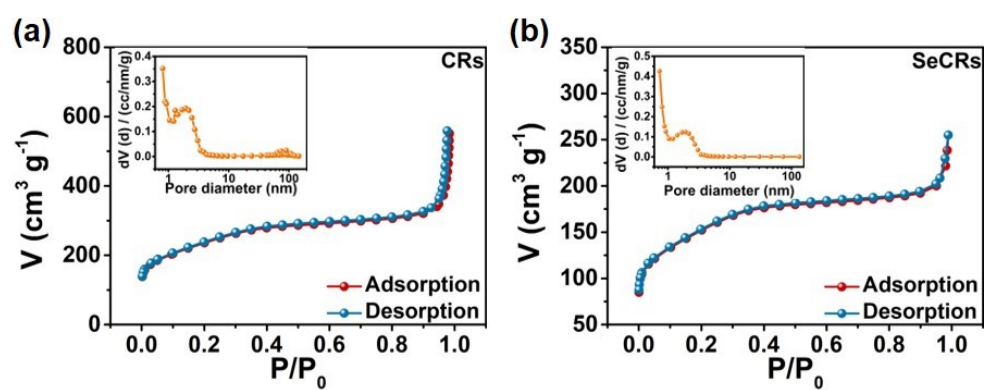

**Figure S6.**  $N_2$  adsorption isotherms and the corresponding pore size distribution of (a) CRs and (b) SeCRs.

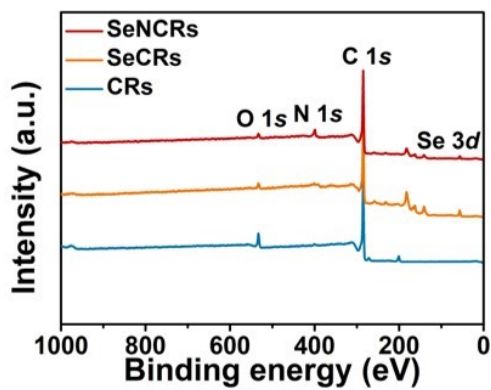

Figure S7. The XPS survey spectra.

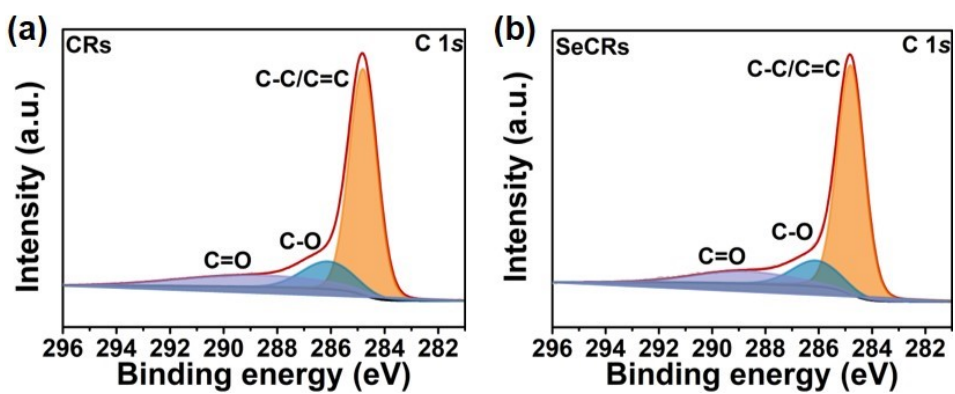

Figure S8. High-resolution C 1s XPS of (a) CRs and (b) SeCRs.



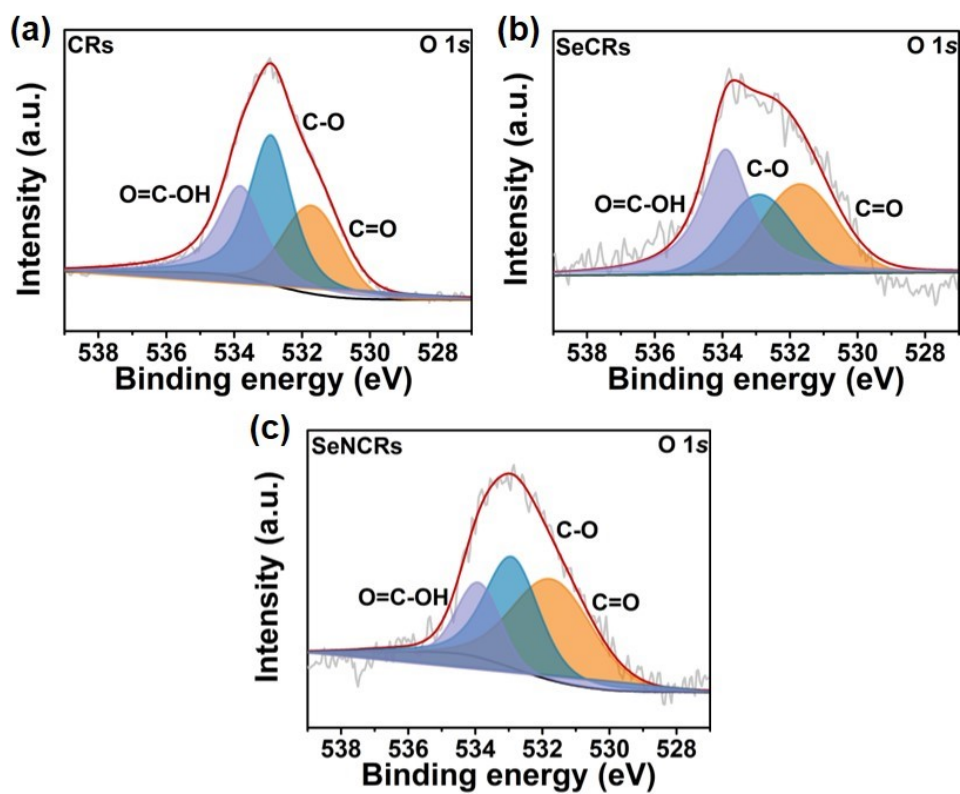

Figure S9. High-resolution O 1s XPS of (a) CRs, (b) SeCRs and (c) SeNCRs.

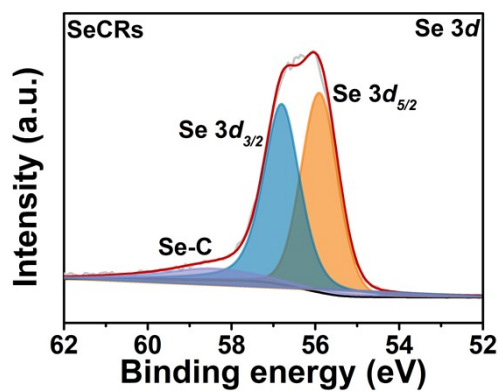

Figure S10. High-resolution Se 3d XPS of SeCRs.

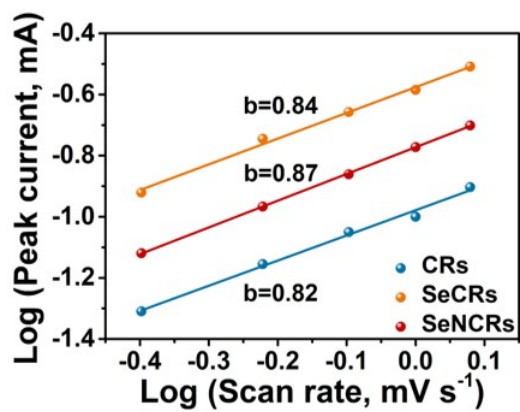

**Figure S11.** The plots of  $\log(i)$ - $\log(v)$  for the  $b$ -value determination from CV scans of CRs, SeCRs and SeNCRs.

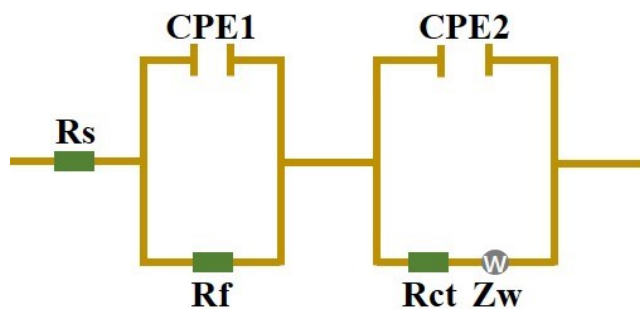

**Figure S12.** The equivalent circuit model of electrochemical impedance spectroscopy.

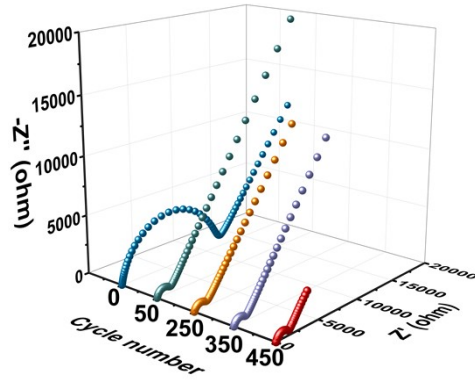

**Figure S13.** EIS curves of SeNCRs after different cycles from the 0 to 450 th cycles.

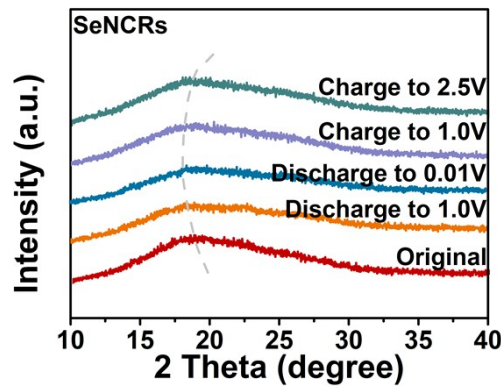

**Figure S14.** *Ex-situ* XRD patterns of the SeNCRs.

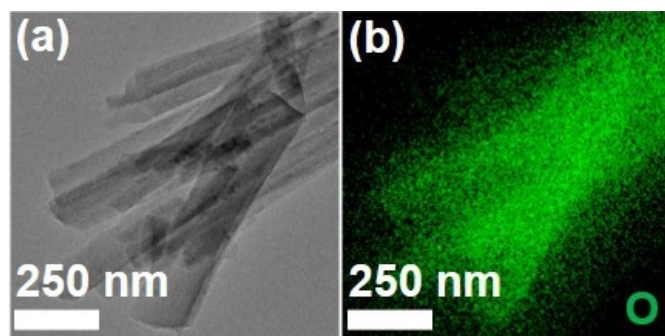

**Figure S15.** (a) and (b) EDS mapping images of SeNCRs after discharge/charge process.

**Table S1.** Specific surface area and pore size of CRs, NCRs and SeNCRs.

| Samples | Specific surface area (m <sup>2</sup> g <sup>-1</sup> ) | Pore diameter (nm) |
|---------|---------------------------------------------------------|--------------------|
| CRs     | 829.9                                                   | 5.7                |
| SeCRs   | 533.8                                                   | 3.0                |
| SeNCRs  | 876.2                                                   | 4.2                |

**Table S2.** Element composition of different samples from the XPS test.

| Samples | Se(at%) | O(at%) | N(at%) | Pyridinic-N (%) | Pyrrolic-N (%) | Graphitic-N (%) |
|---------|---------|--------|--------|-----------------|----------------|-----------------|
| SeCRs   | 4.53    | 1.1    | -      | -               | -              | -               |
| SeNCRs  | 1.81    | 0.94   | 5.14   | 31.1            | 42.5           | 26.4            |
